# Supplementary material
Source: publisher figshare collection journal article supplement (https://future-science-group.figshare.com/ndownloader/files/34216874)
Supplement: Supplementary file 1 [file 34216874]

**Supplementary Table 1. Effects of ER and PR on AR expression across the 20th, 45th, 60th and 80th quantiles**

**of the AR expression distribution**

|  | Coefficient | Std. Error | t | *p*-value | 95% Confidence Interval | |
| --- | --- | --- | --- | --- | --- | --- |
| 20th quantile |  |  |  |  |  |  |
| (Intercept) | -16.909 | 16.434 | -1.029 | 0.304 | -49.202 | 15.384 |
| ER% | 0.400 | 0.195 | 2.056 | 0.040 | 0.018 | 0.782 |
| PR% | 0.455 | 0.111 | 4.093 | 0.000 | 0.236 | 0.673 |
| 40th quantile |  |  |  |  |  |  |
| (Intercept) | 3.189 | 3.069 | 1.039 | 0.299 | -2.842 | 9.220 |
| ER% | 0.680 | 0.036 | 18.709 | 0.000 | 0.608 | 0.751 |
| PR% | 0.013 | 0.021 | 0.606 | 0.545 | -0.028 | 0.053 |
| 60th quantile |  |  |  |  |  |  |
| (Intercept) | 16.396 | 4.430 | 3.701 | 0.000 | 7.692 | 25.101 |
| ER% | 0.544 | 0.052 | 10.364 | 0.000 | 0.441 | 0.647 |
| PR% | 0.021 | 0.030 | 0.691 | 0.490 | -0.038 | 0.079 |
| 80th quantile |  |  |  |  |  |  |
| (Intercept) | 16.706 | 5.623 | 2.971 | 0.003 | 5.657 | 27.755 |
| ER% | 0.622 | 0.067 | 9.350 | 0.000 | 0.492 | 0.753 |
| PR% | 0.182 | 0.038 | 4.785 | 0.000 | 0.107 | 0.256 |

**Abbreviations**

AR, androgen receptor; ER, estrogen receptor; PR, progesterone receptor
